# Supplementary material
Source: PubMed Central journal article supplement (PMC8506130)
Supplement: CEI-206-184-s002.pdf [file CEI-206-184-s002.pdf]

## Supplementary Figure 1

### CD4<sup>+</sup>CD25<sup>+</sup>CD127<sup>-/low</sup>CD45RA<sup>+</sup>FoxP3<sup>+</sup> cells

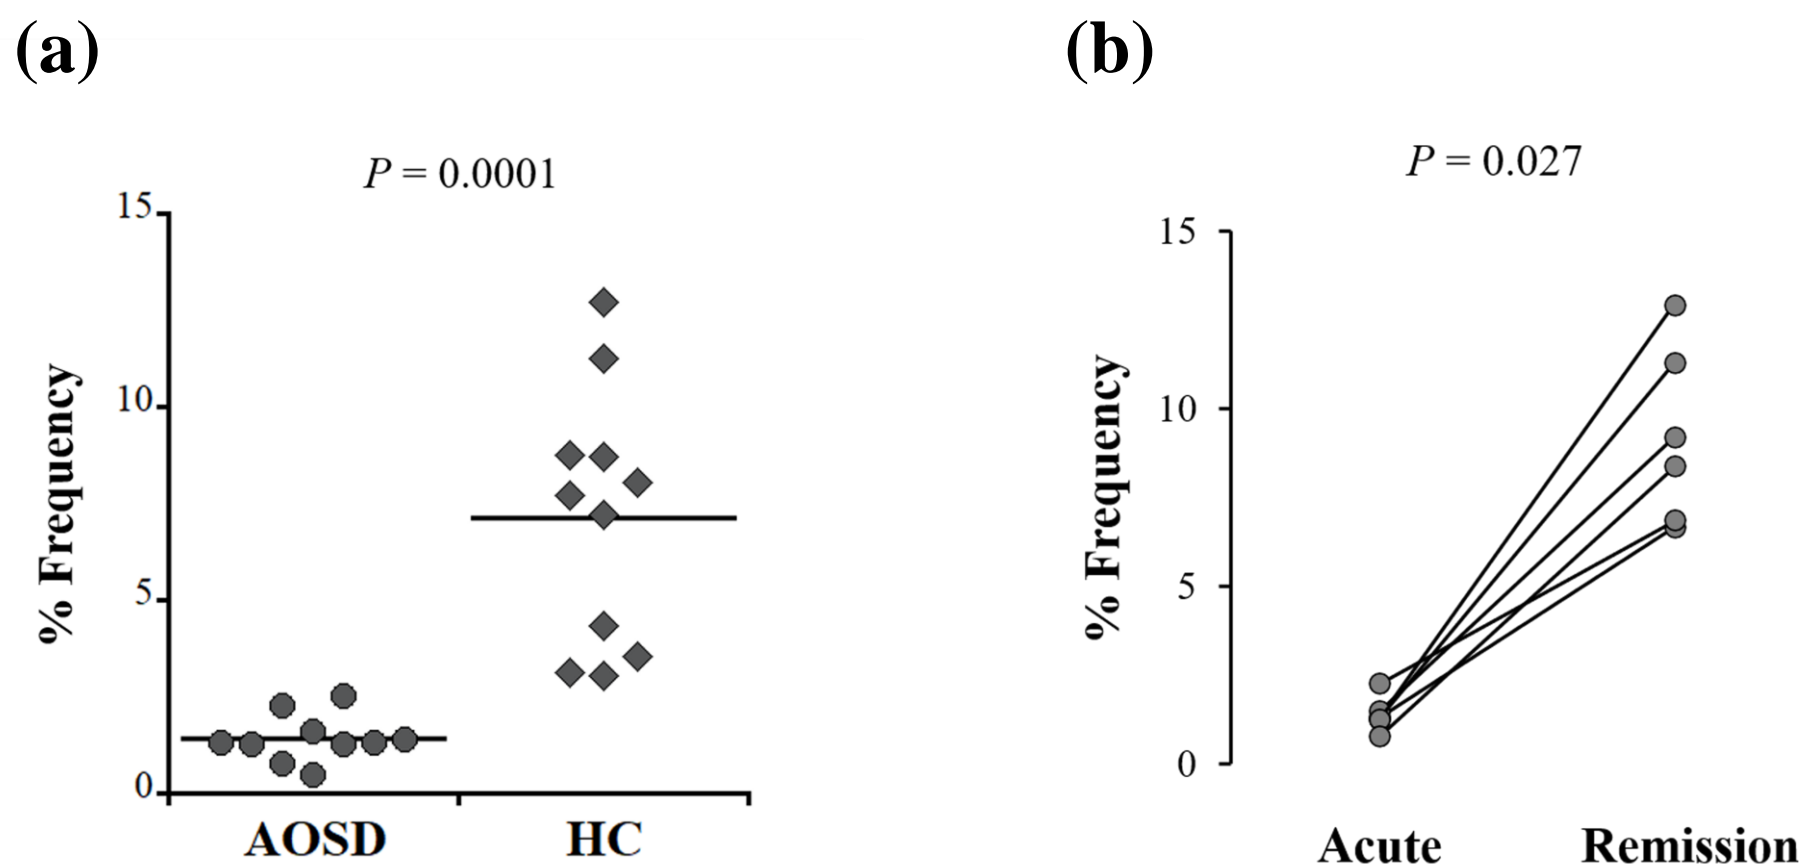

Proportions of circulating CD4<sup>+</sup>CD25<sup>+</sup>CD127<sup>-/low</sup>CD45RA<sup>+</sup>FoxP3<sup>+</sup> cells and their FoxP3 expression. **(a)**: Comparison of CD4<sup>+</sup>CD25<sup>+</sup>CD127<sup>-/low</sup>CD45RA<sup>+</sup>FoxP3<sup>+</sup> cells between patients with acute AOSD and healthy controls (HC). **(b)**: Differences in the proportions of CD4<sup>+</sup>CD25<sup>+</sup>CD127<sup>-/low</sup>CD45RA<sup>+</sup>FoxP3<sup>+</sup> cells in 6 patients between the acute and remission phases of AOSD. The Mann-Whitney U test was used for comparison between acute AOSD patients and HC. The Wilcoxon signed ranked test was used for comparison between acute and remission phases in 6 AOSD patients.

# Supplementary Figure 2

(a)

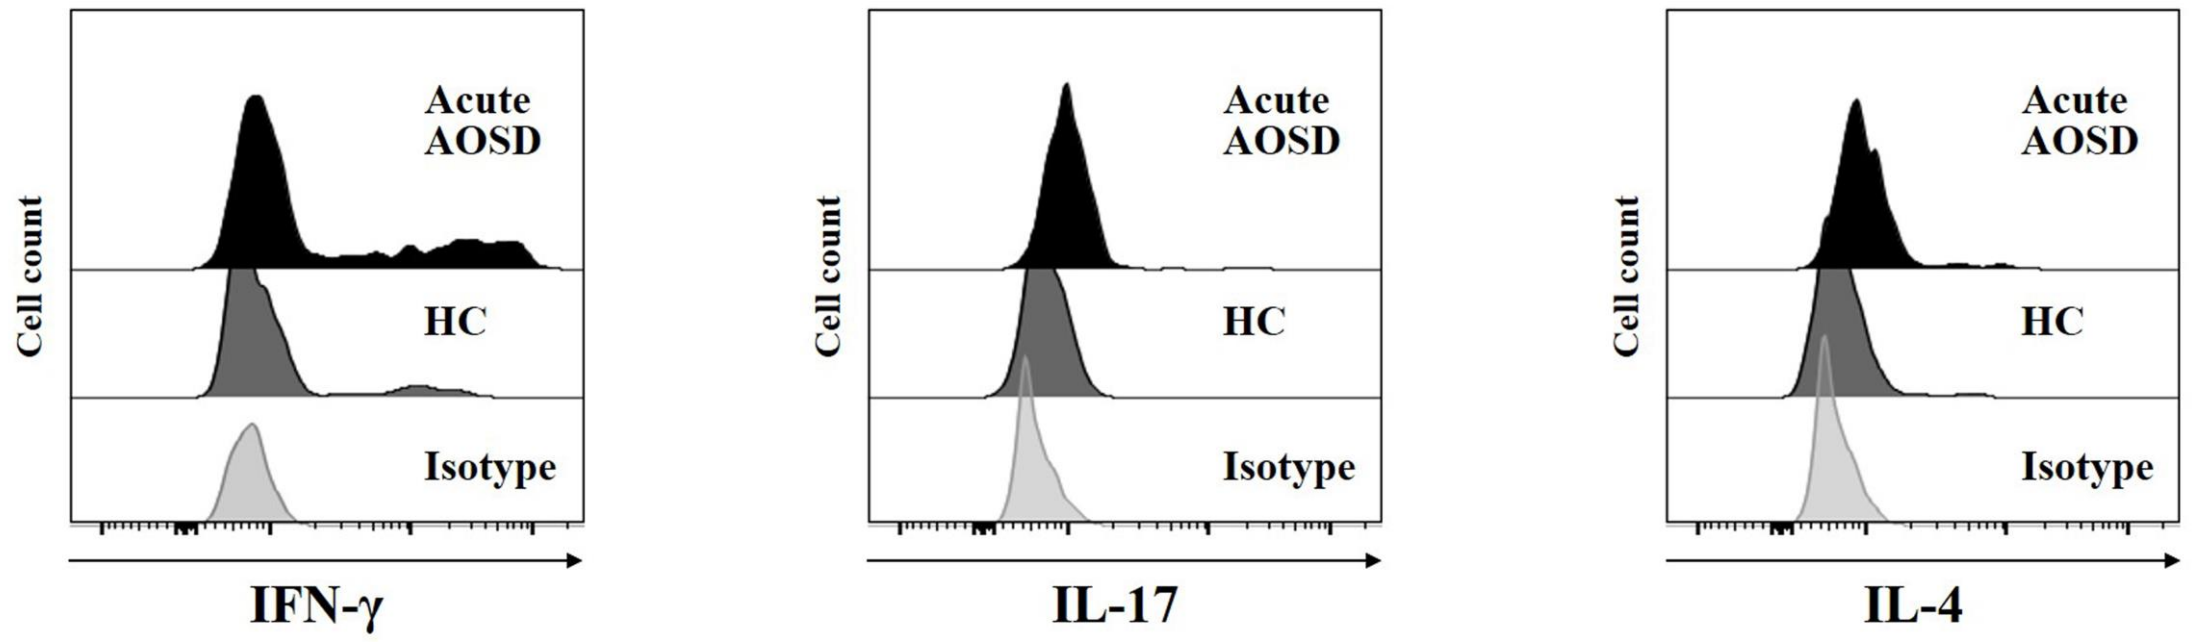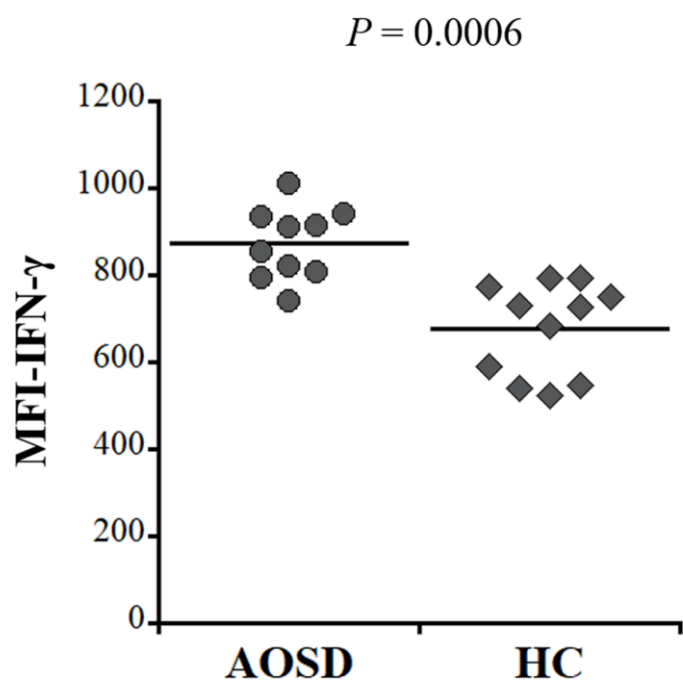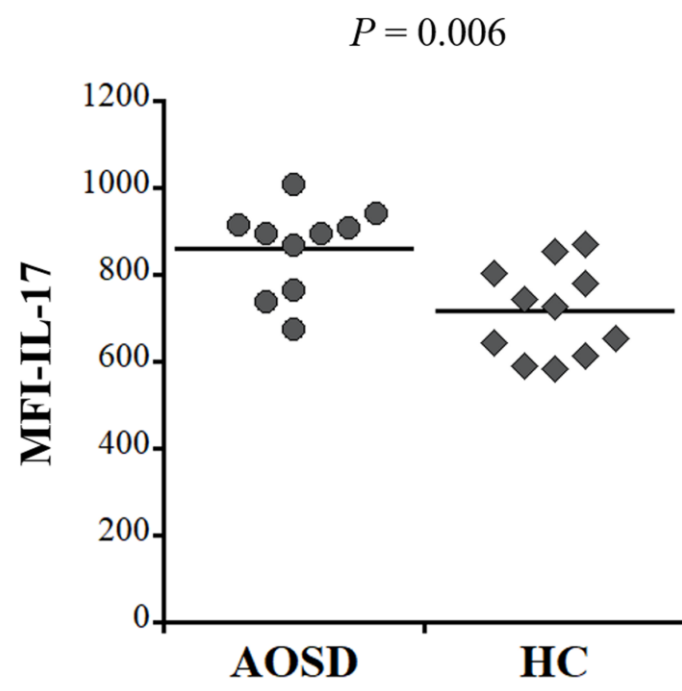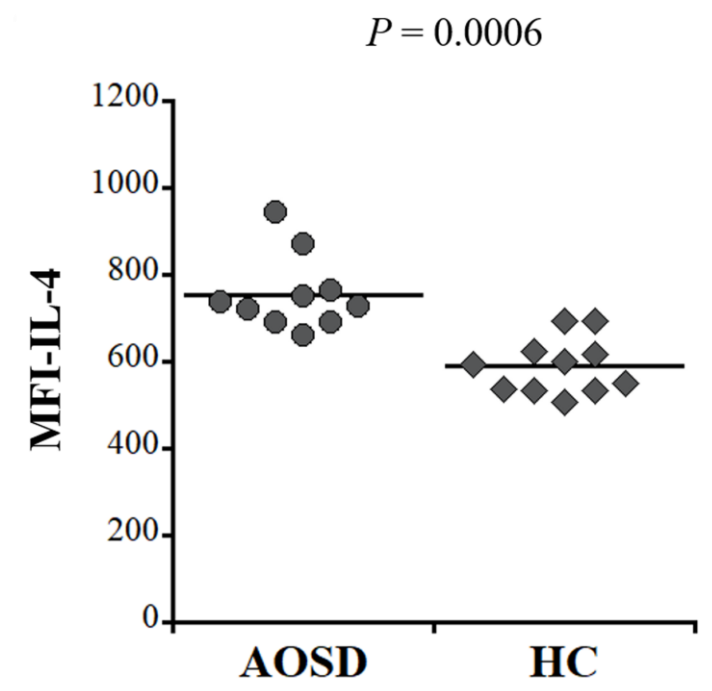

(b)

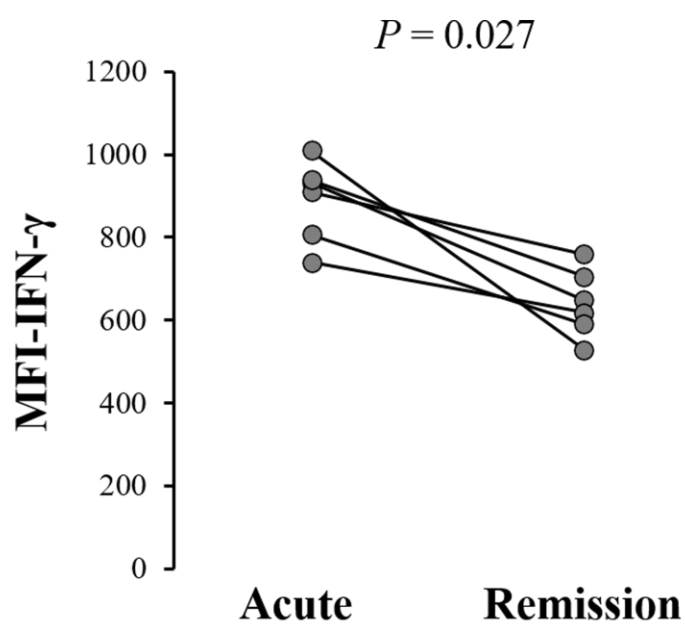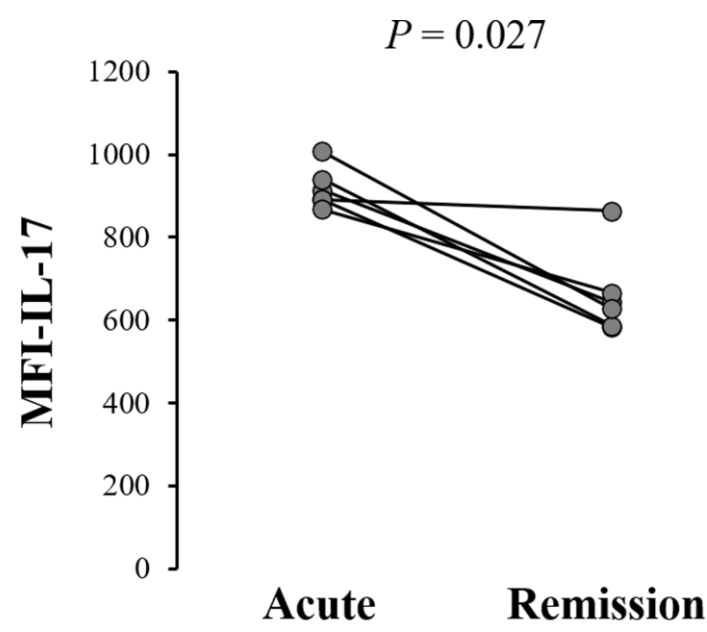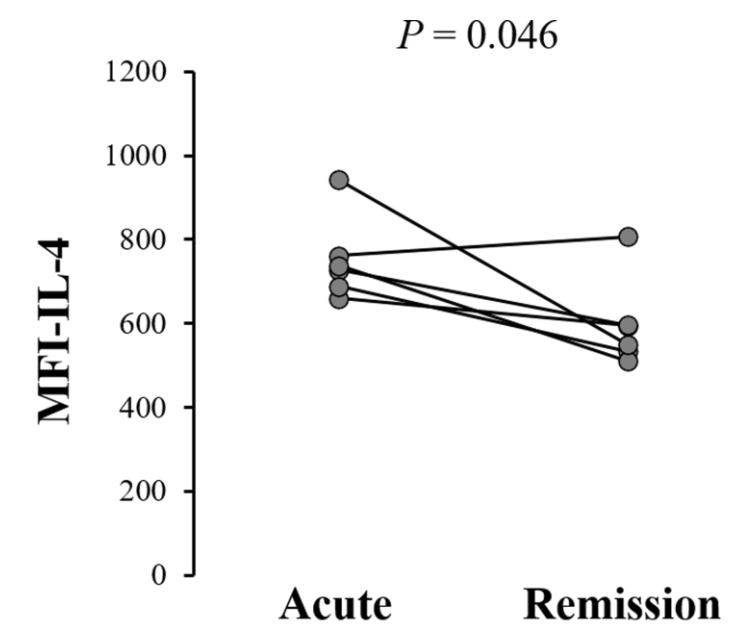

## Supplementary Figure 2

Intracellular expression of effector cytokines in  $CD4^+CD25^+CD127^{-/low}CD45RA^+FoxP3^+$  cells .

**(a):** (upper panels) Representative histograms of IFN- $\gamma$ , IL-17, and IL-4 expression in  $CD4^+CD25^+CD127^{-/low}CD45RA^+FoxP3^+$  cells. (lower bar graphs) Comparisons of the MFI of IFN- $\gamma$ , IL-17, and IL-4 in  $CD4^+CD25^+CD127^{-/low}CD45RA^+FoxP3^+$  cells between acute AOSD and HC. **(b):** Differences in the MFI of IFN- $\gamma$ , IL-17, and IL-4 in  $CD4^+CD25^+CD127^{-/low}CD45RA^+FoxP3^+$  cells from 6 patients between acute and remission phases. The Mann-Whitney U test was used for comparisons between acute AOSD patients and HC. The Wilcoxon signed ranked test was used for comparison between acute and remission phases in 6 AOSD patients.

# Supplementary Figure 3

(a)

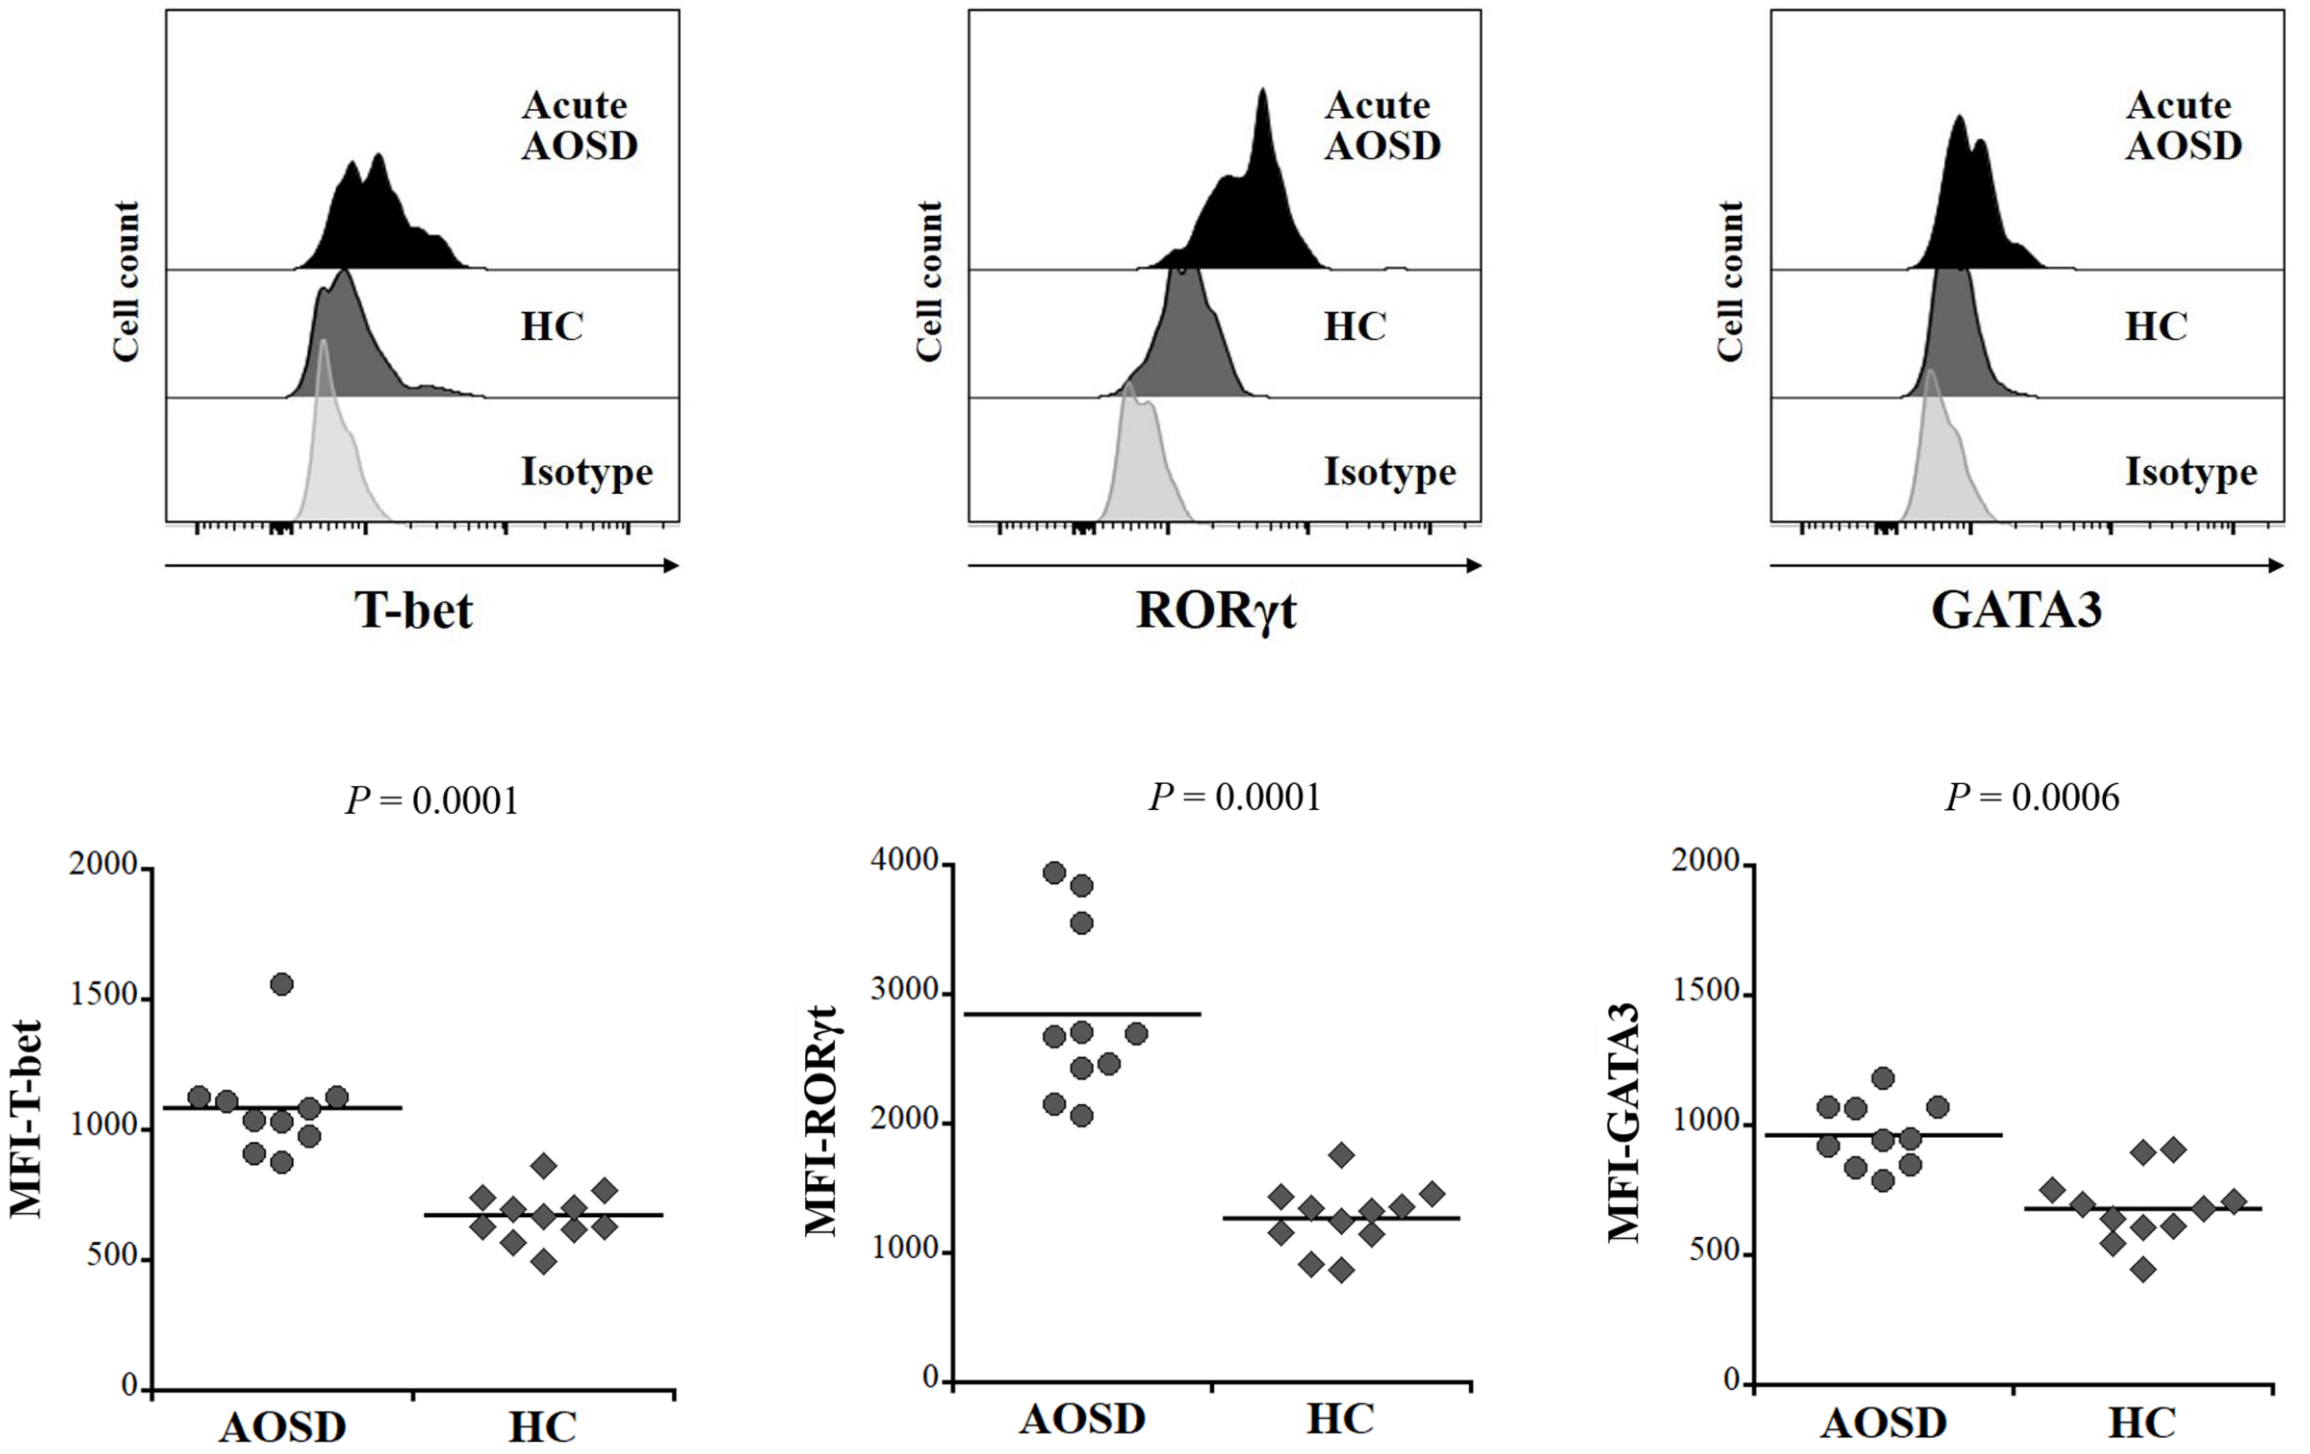

(b)

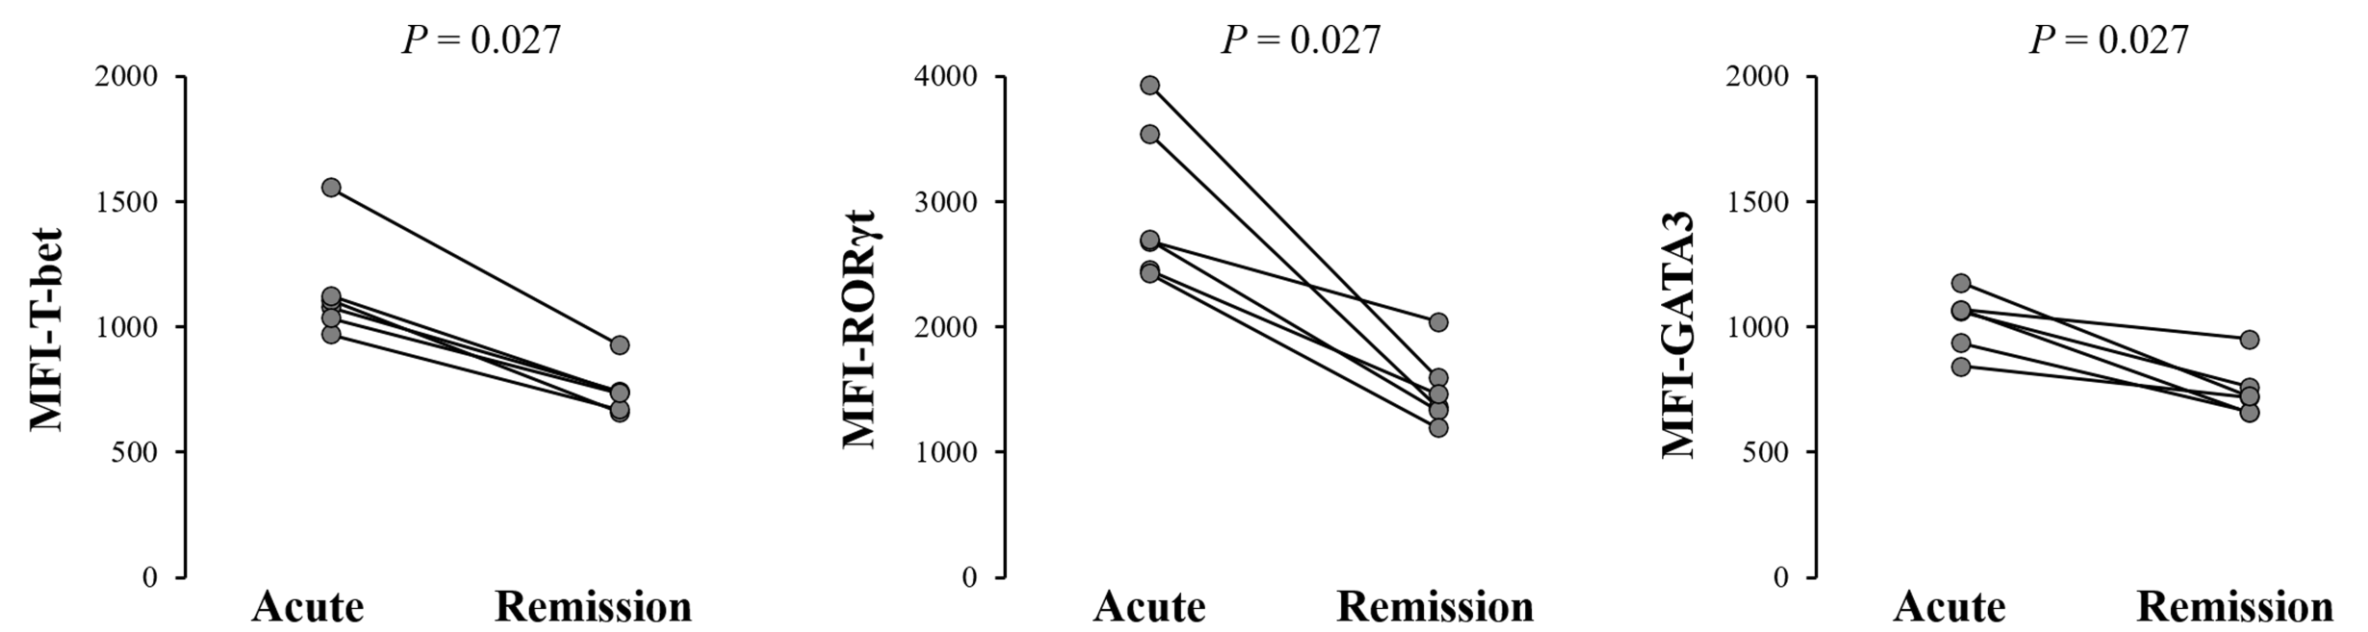

## Supplementary Figure 3

Intracellular expression of transcription factors in CD4<sup>+</sup>CD25<sup>+</sup>CD127<sup>-/low</sup>CD45RA<sup>+</sup>FoxP3<sup>+</sup> cells .

**(a):** (upper panels) Representative histograms of T-bet, ROR $\gamma$ t, and GATA3 expression in CD4<sup>+</sup>CD25<sup>+</sup>CD127<sup>-/low</sup>CD45RA<sup>+</sup>FoxP3<sup>+</sup> cells. (lower bar graphs) Comparisons of the MFI of T-bet, ROR $\gamma$ t, and GATA3 in CD4<sup>+</sup>CD25<sup>+</sup>CD127<sup>-/low</sup>CD45RA<sup>+</sup>FoxP3<sup>+</sup> cells between acute AOSD and HC.

**(b):** Differences in the MFI of T-bet, ROR $\gamma$ t, and GATA3 in CD4<sup>+</sup>CD25<sup>+</sup>CD127<sup>-/low</sup>CD45RA<sup>+</sup>FoxP3<sup>+</sup> cells from 6 patients between acute and remission phases. The Mann-Whitney U test was used for comparisons between acute AOSD patients and HC. The Wilcoxon signed ranked test was used for comparison between acute and remission phases in 6 AOSD patients.

## Supplementary Figure 4

In  $CD4^+CD25^+CD127^{-/low}CD45RA^+$  cells

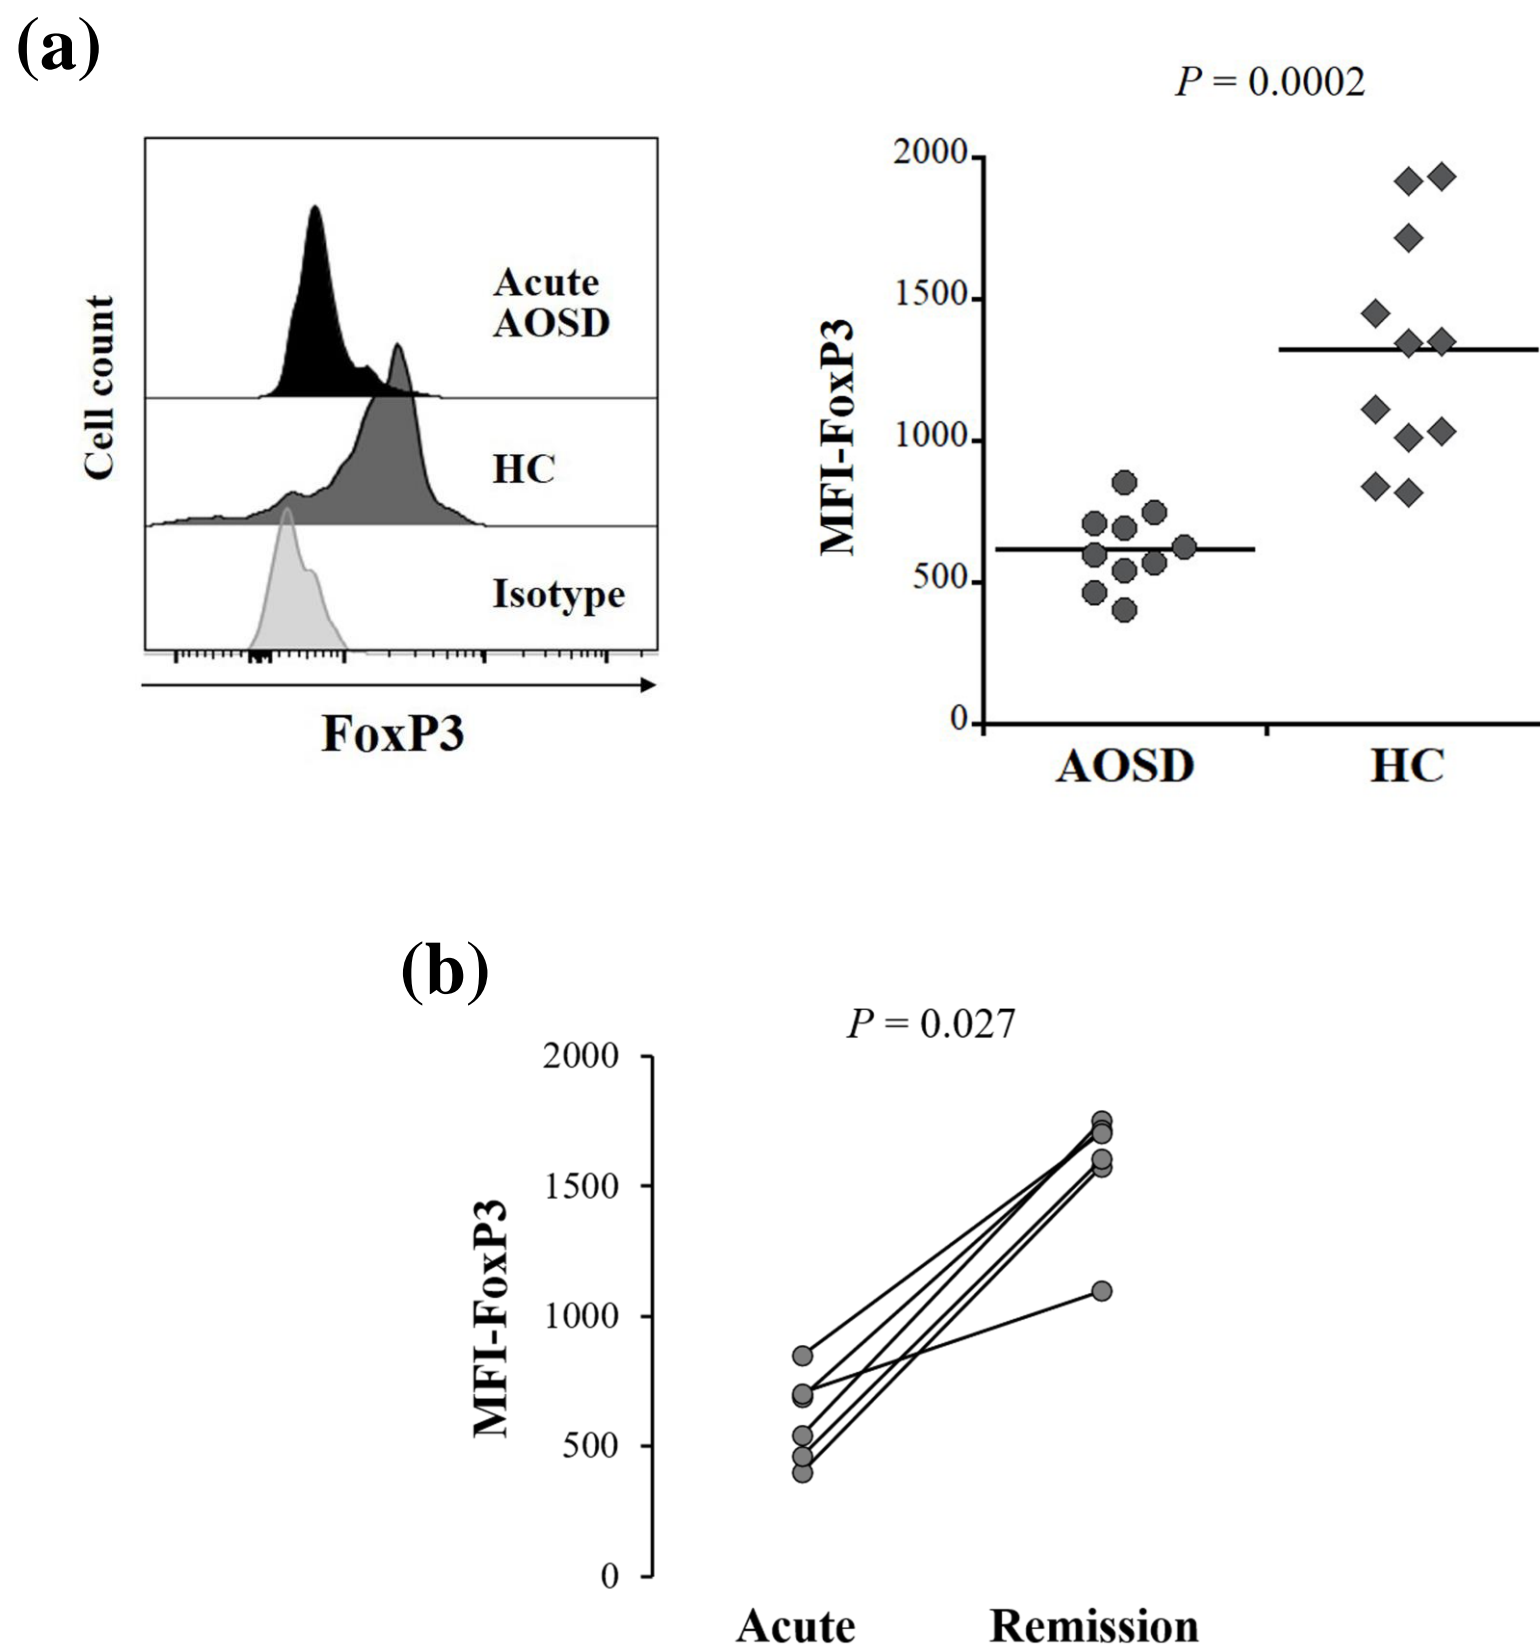

FoxP3 expression in  $CD4^+CD25^+CD127^{-/low}CD45RA^+$  cells.

**(a)**: Comparison of the median fluorescence index (MFI) of FoxP3 in  $CD4^+CD25^+CD127^{-/low}CD45RA^+$  cells between patients with acute AOSD and HC (upper panels). **(b)**: Differences in the MFI of FoxP3 in  $CD4^+CD25^+CD127^{-/low}CD45RA^+$  cells in 6 patients between the acute and remission phases of AOSD. The Mann-Whitney U test was used for comparison between acute AOSD patients and HC. The Wilcoxon signed ranked test was used for comparison between acute and remission phases in 6 AOSD patients.

## Supplementary Figure 5

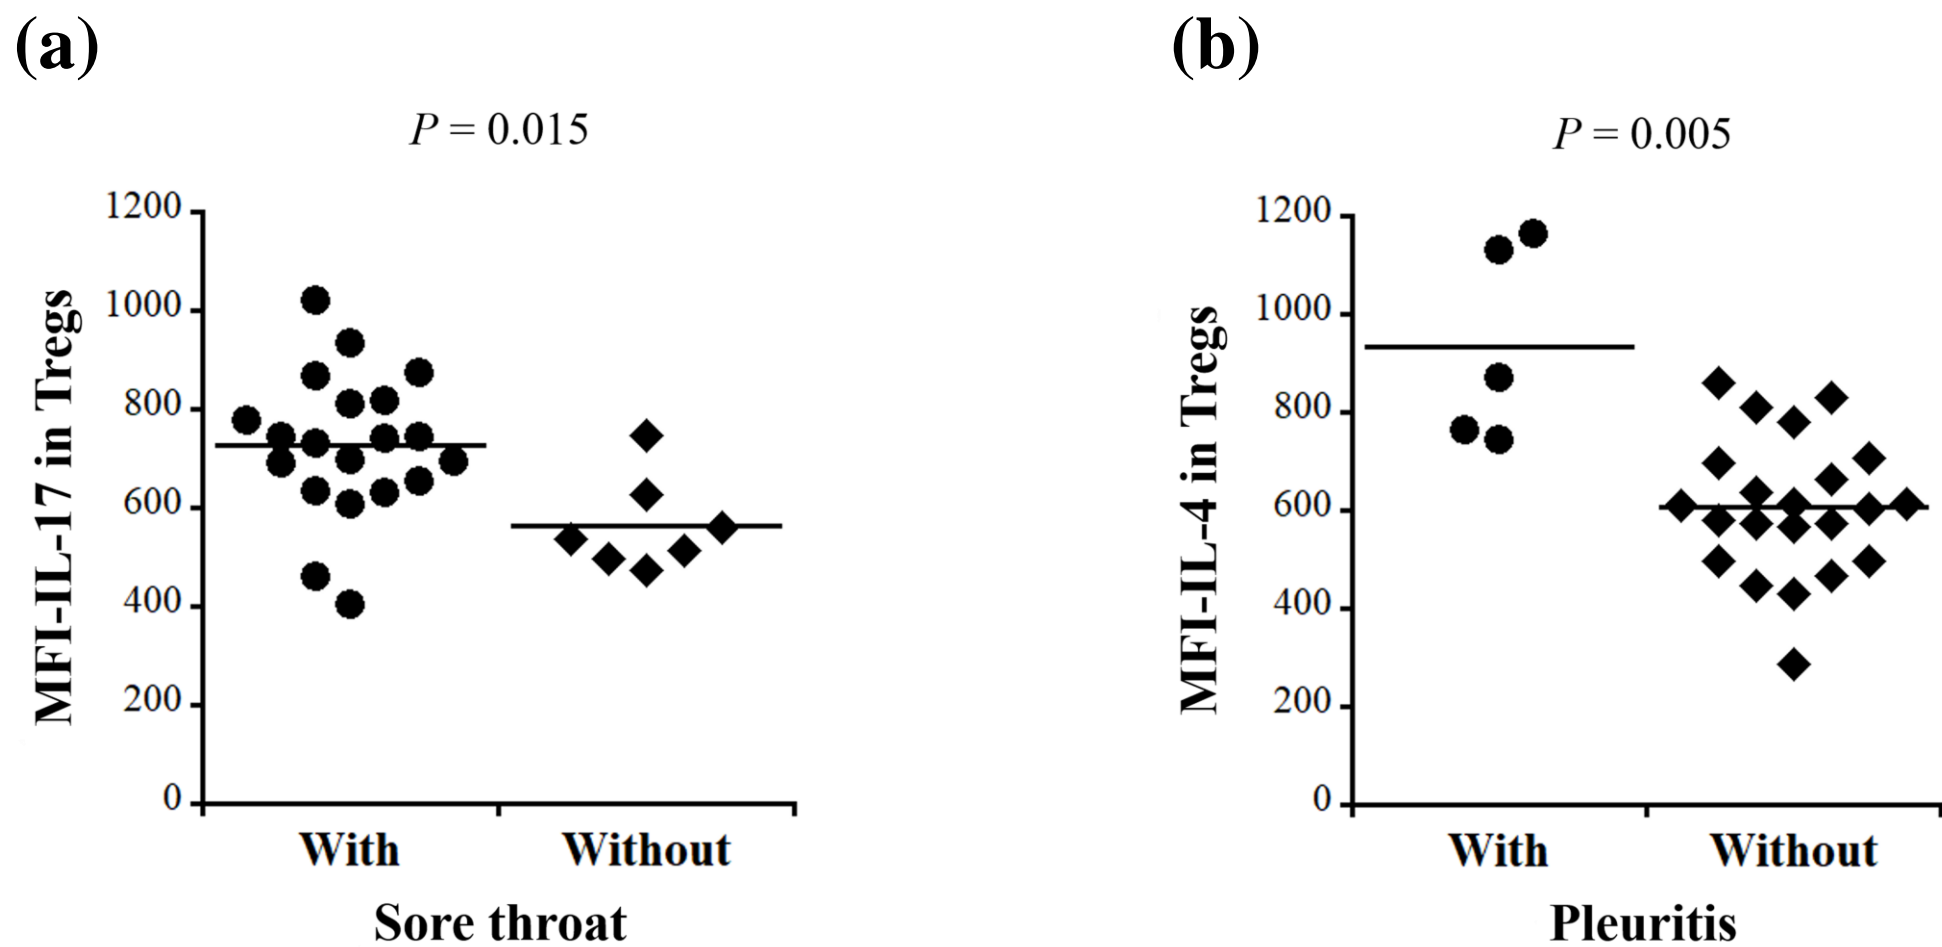

Significant results of effector cytokine expression in  $CD4^+CD25^+FoxP3^+$  cells (Tregs) between AOSD patients with and without clinical features.

(a): The median fluorescence index (MFI) of IL-17 in Tregs in AOSD patients with and without sore throat. (b): The MFI of IL-4 in Tregs in those with and without pleuritis. The Mann-Whitney U test was used for comparisons.
